# Supplementary material for: Quantum chemical calculations on NbO and its reaction with methane: ground and excited electronic states
Source: Royal Society of Chemistry journal article supplement (doi:10.1039/c9cp05408a), 2019-01-01
Supplement: c9cp05408a1.pdf [file c9cp05408a1.pdf]

**Electronic Supplementary Information**

*Quantum Chemical Calculations on NbO and its Reaction with Methane:  
Ground and Excited Electronic States*

Emily E. Claveau and Evangelos Miliordos\*

Department of Chemistry and Biochemistry, Auburn University,  
Auburn, AL 36849, USA

\* To whom correspondence should be addressed. E-mail: [emiliord@auburn.edu](mailto:emiliord@auburn.edu)

**Table S1:** Optimal geometries (Cartesian coordinates in Å) of the reactants (R), their interacting complex (ICR), first transition state (TS1), intermediate (I), second transition state (TS2), interacting complex of the products (ICP), and products (P) of the NbO + CH<sub>4</sub> → Nb + CH<sub>3</sub>OH reaction for the lowest doublet, quartet, and sextet states at the MN15 level theory.

|                          | Doublet                                                                                                                                                                                                                                                                                                  | Quartet                                                                                                                                                                                                                                                                                                   | Sextet                                                                                                                                                                                                                                                                                                     |
|--------------------------|----------------------------------------------------------------------------------------------------------------------------------------------------------------------------------------------------------------------------------------------------------------------------------------------------------|-----------------------------------------------------------------------------------------------------------------------------------------------------------------------------------------------------------------------------------------------------------------------------------------------------------|------------------------------------------------------------------------------------------------------------------------------------------------------------------------------------------------------------------------------------------------------------------------------------------------------------|
| R (NbO+CH <sub>4</sub> ) | Nb 0.000000000 0.000000000 0.270449000<br>O 0.000000000 0.000000000 -1.386052000<br>C 0.000000000 0.000000000 0.000000000<br>H -0.627579000 0.627579000 -0.627579000<br>H 0.627579000 -0.627579000 -0.627579000<br>H -0.627579000 -0.627579000 0.627579000<br>H 0.627579000 0.627579000 0.627579000      | Nb 0.000000000 0.000000000 0.273108000<br>O 0.000000000 0.000000000 -1.399679000<br>C 0.000000000 0.000000000 0.000000000<br>H -0.627579000 0.627579000 -0.627579000<br>H 0.627579000 -0.627579000 -0.627579000<br>H -0.627579000 -0.627579000 0.627579000<br>H 0.627579000 0.627579000 0.627579000       | Nb 0.000000000 0.000000000 0.321572000<br>O 0.000000000 0.000000000 -1.648056000<br>C 0.000000000 0.000000000 0.000000000<br>H -0.627579000 0.627579000 -0.627579000<br>H 0.627579000 -0.627579000 -0.627579000<br>H -0.627579000 -0.627579000 0.627579000<br>H 0.627579000 0.627579000 0.627579000        |
| ICR                      | Nb 0.375949000 -0.002581000 -0.001233000<br>O 2.036763000 0.008998000 0.004297000<br>C -3.169307000 0.003366000 0.001693000<br>H -2.798305000 0.460232000 -0.915839000<br>H -2.825093000 0.574874000 0.863419000<br>H -2.811668000 -1.023535000 0.073570000<br>H -4.257092000 0.002052000 -0.015147000   | Nb 0.241826000 0.064750000 -0.000135000<br>O 1.906001000 -0.206856000 0.000439000<br>C -2.512771000 -0.098588000 0.000192000<br>H -2.077446000 -0.682128000 -0.821036000<br>H -2.310586000 0.967654000 -0.142593000<br>H -2.110310000 -0.436626000 0.963053000<br>H -3.587908000 -0.257290000 0.001464000 | Nb -0.168204000 0.000164000 -0.013787000<br>O -2.160251000 -0.000476000 0.040418000<br>C 2.413031000 -0.000312000 0.030929000<br>H 1.830173000 0.930131000 -0.115141000<br>H 1.830200000 -0.929403000 -0.123861000<br>H 2.849530000 -0.005134000 1.024861000<br>H 3.190296000 0.003365000 -0.729502000     |
| TS1                      | Nb 0.381647000 -0.293219000 -0.000003000<br>O 0.367454000 1.465307000 0.000030000<br>C -1.852360000 -0.032075000 0.000078000<br>H -2.397729000 0.269128000 -0.893924000<br>H -1.854093000 -1.137927000 -0.002549000<br>H -2.395605000 0.265533000 0.896593000<br>H -0.825565000 1.095209000 -0.000718000 | Nb 0.429053000 -0.269709000 0.000004000<br>O 0.188864000 1.497199000 -0.000266000<br>C -1.895576000 -0.149505000 0.000207000<br>H -2.467624000 0.107143000 -0.890957000<br>H -1.829429000 -1.251300000 0.000307000<br>H -2.467411000 0.107331000 0.891454000<br>H -0.964179000 1.014312000 -0.000078000   | Nb -0.741638000 -0.136189000 -0.000002000<br>O 0.648578000 1.212781000 0.000012000<br>C 2.543763000 -0.437773000 0.000039000<br>H 1.743866000 0.483812000 -0.001046000<br>H 1.966158000 -1.360585000 -0.004588000<br>H 3.119292000 -0.309795000 0.910671000<br>H 3.126633000 -0.305276000 -0.905291000     |
| I                        | Nb 0.018076000 -0.195221000 0.000000000<br>O 1.794573000 0.380031000 0.000002000<br>C -1.837964000 0.503037000 -0.000013000<br>H 2.392397000 1.130505000 -0.000057000<br>H -1.895613000 -0.188042000 0.910154000<br>H -2.670837000 1.191178000 0.000090000<br>H -1.895862000 -0.188035000 -0.910144000   | Nb 0.027296000 -0.128591000 0.000007000<br>O 1.878487000 0.241492000 0.000017000<br>C -1.980052000 0.360602000 -0.000106000<br>H 2.603544000 0.868712000 -0.000472000<br>H -2.862750000 0.984601000 -0.000891000<br>H -2.003953000 -0.339479000 -0.883361000<br>H -2.003550000 -0.337151000 0.884954000   | Nb 0.713068000 -0.223020000 -0.000013000<br>O -0.213538000 1.430673000 0.000042000<br>C -2.926762000 -0.413546000 -0.000080000<br>H -1.179481000 1.493291000 0.000932000<br>H -2.402969000 -0.561229000 0.930597000<br>H -2.404336000 -0.558289000 -0.931973000<br>H -3.980132000 -0.194079000 0.001117000 |
| TS2                      | Nb -0.675695000 -0.065642000 -0.003791000<br>O 1.058366000 0.927214000 0.116762000<br>C 1.929194000 -0.620600000 -0.013090000<br>H 1.311739000 1.461897000 -0.654354000                                                                                                                                  | Nb -0.700671000 -0.077972000 -0.003968000<br>O 1.009631000 0.918563000 0.118101000<br>C 2.104860000 -0.573611000 -0.014955000<br>H 1.182891000 1.480632000 -0.660477000                                                                                                                                   | Nb -0.823513000 -0.068234000 -0.005270000<br>O 1.051215000 0.665523000 0.119544000<br>C 2.621246000 -0.388935000 -0.021504000<br>H 1.265920000 1.345785000 -0.534689000                                                                                                                                    |

|                            |                                                                                                                                                                                                                                                                                                                                 |                                                                                                                                                                                                                                                                                                                                |                                                                                                                                                                                                                                                                                                                                 |
|----------------------------|---------------------------------------------------------------------------------------------------------------------------------------------------------------------------------------------------------------------------------------------------------------------------------------------------------------------------------|--------------------------------------------------------------------------------------------------------------------------------------------------------------------------------------------------------------------------------------------------------------------------------------------------------------------------------|---------------------------------------------------------------------------------------------------------------------------------------------------------------------------------------------------------------------------------------------------------------------------------------------------------------------------------|
|                            | H 2.8853950000 -0.1186680000 -0.0741380000<br>H 1.7767220000 -1.1421680000 0.9226560000<br>H 1.6875610000 -1.2038340000 -0.8942870000                                                                                                                                                                                           | H 2.9787390000 0.0422790000 -0.1640700000<br>H 2.0051320000 -1.0054630000 0.9688110000<br>H 1.8545210000 -1.2274240000 -0.8366680000                                                                                                                                                                                           | H 3.3911900000 0.2908150000 0.3096060000<br>H 2.3363260000 -1.1590660000 0.6770580000<br>H 2.6334030000 -0.6704910000 -1.0632400000                                                                                                                                                                                             |
| ICP                        | Nb 0.8217940000 -0.0431970000 0.0000270000<br>O -1.2200750000 0.4874470000 -0.0006200000<br>C -2.4086560000 -0.3261440000 0.0001610000<br>H -1.4290610000 1.4317700000 0.0021470000<br>H -2.9937890000 -0.1198280000 -0.8935520000<br>H -2.0699840000 -1.3570190000 -0.0047240000<br>H -2.9881860000 -0.1265550000 0.8990270000 | Nb 0.8117630000 -0.0452880000 0.0033250000<br>O -1.2445670000 0.5552100000 -0.0883890000<br>C -2.3477350000 -0.3655770000 0.0209630000<br>H -1.4268810000 1.4055180000 0.3384830000<br>H -3.2321180000 0.0787410000 -0.4305370000<br>H -2.0548720000 -1.2565260000 -0.5262430000<br>H -2.5254500000 -0.6191330000 1.0633100000 | Nb 0.8218430000 -0.0437700000 0.0035370000<br>O -1.3303500000 0.6185390000 -0.1100210000<br>C -2.3134500000 -0.4123370000 0.0234090000<br>H -1.5273090000 1.3630430000 0.4708910000<br>H -3.2996070000 -0.0283010000 -0.2363420000<br>H -2.0301970000 -1.1961470000 -0.6745040000<br>H -2.3149480000 -0.8182970000 1.0346620000 |
| P (Nb+ CH <sub>3</sub> OH) | Nb 0.0000000000 0.0000000000 0.0000000000<br>O -0.7426320000 0.1225970000 0.0000000000<br>C 0.6615670000 -0.0209960000 0.0000000000<br>H -1.1571160000 -0.7440210000 0.0000000000<br>H 1.0863940000 0.9799760000 -0.0000010000<br>H 1.0211870000 -0.5453750000 0.8891790000<br>H 1.0211870000 -0.5453760000 -0.8891780000       | Nb 0.0000000000 0.0000000000 0.0000000000<br>O -0.7426320000 0.1225970000 0.0000000000<br>C 0.6615670000 -0.0209960000 0.0000000000<br>H -1.1571160000 -0.7440210000 0.0000000000<br>H 1.0863940000 0.9799760000 -0.0000010000<br>H 1.0211870000 -0.5453750000 0.8891790000<br>H 1.0211870000 -0.5453760000 -0.8891780000      | Nb 0.0000000000 0.0000000000 0.0000000000<br>O -0.7426320000 0.1225970000 0.0000000000<br>C 0.6615670000 -0.0209960000 0.0000000000<br>H -1.1571160000 -0.7440210000 0.0000000000<br>H 1.0863940000 0.9799760000 -0.0000010000<br>H 1.0211870000 -0.5453750000 0.8891790000<br>H 1.0211870000 -0.5453760000 -0.8891780000       |

**Table S2:** Harmonic vibrational frequencies ( $\text{cm}^{-1}$ ) of the reactants (R), their interacting complex (ICR), first transition state (TS1), intermediate (I), second transition state (TS2), interacting complex of the products (ICP), and products (P) of the  $\text{NbO} + \text{CH}_4 \rightarrow \text{Nb} + \text{CH}_3\text{OH}$  reaction for the lowest doublet, quartet, and sextet states at the MN15 level theory.

|         | R    |                 | ICR  | TS1   | I    | TS2  | ICP  | P  |                    |
|---------|------|-----------------|------|-------|------|------|------|----|--------------------|
| Doublet | NbO  | CH <sub>4</sub> | 33   | -1659 | 154  | -877 | 51   | Nb | CH <sub>3</sub> OH |
|         | 1095 | 1325            | 33   | 135   | 201  | 143  | 201  |    | 285                |
|         |      | 1325            | 40   | 253   | 475  | 206  | 348  |    | 1051               |
|         |      | 1325            | 157  | 303   | 494  | 435  | 384  |    | 1115               |
|         |      | 1546            | 162  | 523   | 504  | 535  | 1023 |    | 1169               |
|         |      | 1546            | 1082 | 724   | 648  | 685  | 1064 |    | 1341               |
|         |      | 3066            | 1309 | 934   | 725  | 761  | 1151 |    | 1471               |
|         |      | 3183            | 1323 | 958   | 735  | 931  | 1330 |    | 1491               |
|         |      | 3183            | 1324 | 1237  | 1108 | 1204 | 1450 |    | 1501               |
|         |      | 3183            | 1537 | 1396  | 1413 | 1419 | 1484 |    | 3039               |
|         |      |                 | 1538 | 1441  | 1443 | 1425 | 1484 |    | 3091               |
|         |      |                 | 3037 | 2025  | 2568 | 3107 | 3087 |    | 3157               |
|         |      |                 | 3151 | 2946  | 2612 | 3232 | 3175 |    | 3909               |
|         |      |                 | 3153 | 3096  | 3246 | 3254 | 3201 |    |                    |
|         |      |                 | 3170 | 3146  | 3942 | 3735 | 3796 |    |                    |
| Quartet | NbO  | CH <sub>4</sub> | 14   | -1706 | 130  | -847 | 80   | Nb | CH <sub>3</sub> OH |
|         | 1051 | 1325            | 37   | 133   | 161  | 101  | 153  |    | 285                |
|         |      | 1325            | 129  | 299   | 405  | 134  | 324  |    | 1051               |
|         |      | 1325            | 300  | 479   | 445  | 542  | 359  |    | 1115               |
|         |      | 1546            | 324  | 480   | 459  | 557  | 1019 |    | 1169               |
|         |      | 1546            | 1022 | 651   | 522  | 678  | 1051 |    | 1341               |
|         |      | 3066            | 1317 | 904   | 660  | 700  | 1157 |    | 1471               |
|         |      | 3183            | 1320 | 1042  | 710  | 859  | 1306 |    | 1491               |
|         |      | 3183            | 1321 | 1207  | 1123 | 1101 | 1448 |    | 1501               |
|         |      | 3183            | 1531 | 1428  | 1402 | 1408 | 1476 |    | 3039               |
|         |      |                 | 1537 | 1445  | 1413 | 1422 | 1487 |    | 3091               |
|         |      |                 | 2971 | 1845  | 2744 | 3147 | 3090 |    | 3157               |
|         |      |                 | 3074 | 2960  | 2791 | 3284 | 3178 |    | 3909               |
|         |      |                 | 3097 | 3094  | 3237 | 3302 | 3196 |    |                    |
|         |      |                 | 3177 | 3151  | 3956 | 3662 | 3766 |    |                    |

| Sextet | NbO | CH <sub>4</sub> | 59   | -1307 | 36   | -892 | 89   | Nb | CH <sub>3</sub> OH |
|--------|-----|-----------------|------|-------|------|------|------|----|--------------------|
|        | 645 | 1325            | 74   | 53    | 55   | 74   | 128  |    | 285                |
|        |     | 1325            | 188  | 91    | 114  | 118  | 317  |    | 1051               |
|        |     | 1325            | 257  | 349   | 161  | 458  | 381  |    | 1115               |
|        |     | 1546            | 617  | 433   | 205  | 468  | 1047 |    | 1169               |
|        |     | 1546            | 655  | 667   | 278  | 679  | 1060 |    | 1341               |
|        |     | 3066            | 1178 | 720   | 583  | 703  | 1161 |    | 1471               |
|        |     | 3183            | 1347 | 1146  | 622  | 856  | 1316 |    | 1491               |
|        |     | 3183            | 1369 | 1235  | 696  | 1019 | 1453 |    | 1501               |
|        |     | 3183            | 1454 | 1287  | 1379 | 1413 | 1477 |    | 3039               |
|        |     |                 | 1595 | 1424  | 1384 | 1417 | 1485 |    | 3091               |
|        |     |                 | 2863 | 1428  | 3138 | 3138 | 3069 |    | 3157               |
|        |     |                 | 2971 | 3074  | 3305 | 3298 | 3146 |    | 3909               |
|        |     |                 | 3136 | 3191  | 3325 | 3302 | 3174 |    |                    |
|        |     |                 | 3194 | 3226  | 3796 | 3794 | 3844 |    |                    |

**Table S3:** Relative energies (kcal/mol) of the reactants (R), their interacting complex (ICR), first transition state (TS1), intermediate (I), second transition state (TS2), interacting complex of the products (ICP), and products (P) of the NbO + CH<sub>4</sub> → Nb + CH<sub>3</sub>OH reaction for the lowest doublet, quartet, and sextet states at the MN15 level theory.

|     | Doublet | Quartet | Sextet |
|-----|---------|---------|--------|
| R   | 17.2    | 0.0     | 89.5   |
| ICR | 15.6    | -4.5    | 77.4   |
| TS1 | 43.9    | 43.4    | 92.0   |
| I   | 8.0     | -4.7    | 68.4   |
| TS2 | 114.1   | 91.4    | 93.2   |
| ICP | 94.1    | 70.0    | 68.4   |
| P   | 116.3   | 96.8    | 89.3   |

**Table S4:** T1 diagnostics obtained at the CCSD level for the reactants (R), their interacting complex (ICR), first transition state (TS1), intermediate (I), second transition state (TS2), interacting complex of the products (ICP), and products (P) of the NbO + CH<sub>4</sub> → Nb + CH<sub>3</sub>OH reaction for the lowest doublet, quartet, and sextet states.

|     | Doublet    | Quartet    | Sextet     |
|-----|------------|------------|------------|
| R   | 0.03603501 | 0.03719335 | 0.03324193 |
| ICR | 0.02726693 | 0.02806977 | 0.02024265 |
| TS1 | 0.03304312 | 0.04217312 | 0.04048609 |
| I   | 0.02288469 | 0.02150895 | 0.02630955 |
| TS2 | 0.05607254 | 0.07290710 | 0.05987077 |
| ICP | 0.04323861 | 0.05051467 | 0.01997703 |
| P   | 0.02446875 | 0.02253010 | 0.01015360 |

**Table S5:** Coefficients of the two most dominant configurations at the CASSCF level of theory for the reactants (R), their interacting complex (ICR), first transition state (TS1), intermediate (I), second transition state (TS2), interacting complex of the products (ICP), and products (P) of the  $\text{NbO} + \text{CH}_4 \rightarrow \text{Nb} + \text{CH}_3\text{OH}$  reaction for the lowest doublet, quartet, and sextet states.

|     | Doublet      | Quartet      | Sextet       |
|-----|--------------|--------------|--------------|
| R   | 0.92 / -0.25 | 0.96 / -0.09 | 0.98 / -0.09 |
| ICR | 0.91 / -0.18 | 0.96 / -0.09 | 0.98 / -0.08 |
| TS1 | 0.84 / -0.38 | 0.96 / -0.09 | 0.97 / -0.08 |
| I   | 0.97 / 0.12  | 0.98 / 0.05  | 0.99 / -0.06 |
| TS2 | 0.93 / -0.18 | 0.94 / -0.20 | 0.97 / -0.12 |
| ICP | 0.89 / -0.30 | 0.98 / 0.07  | 0.98 / -0.06 |
| P   | 0.59 / -0.56 | 0.99 / 0.02  | 1.00 / 0.00  |

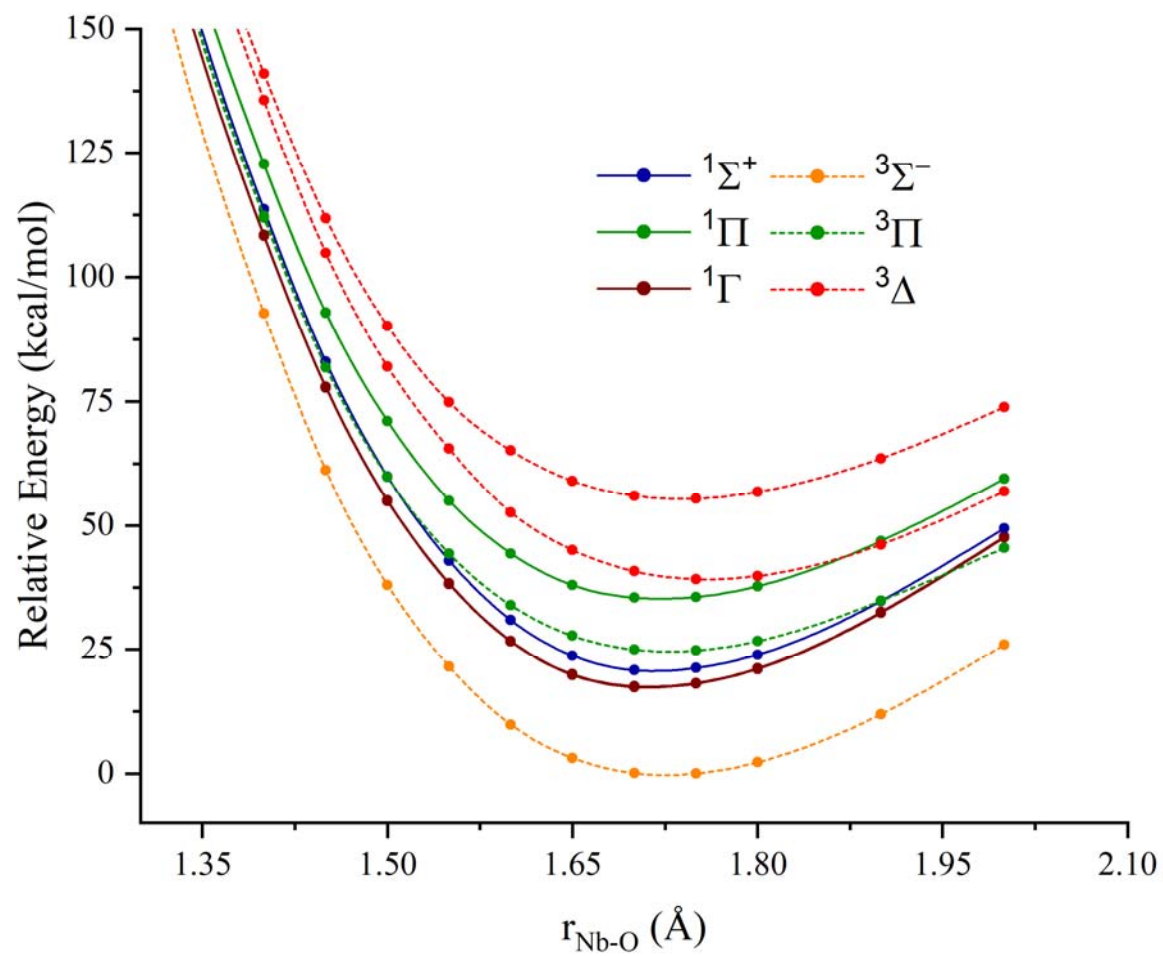

**Figure S1:** MRCI potential energy curves for ground state and lowest six excited electronic states of NbO<sup>-</sup>.



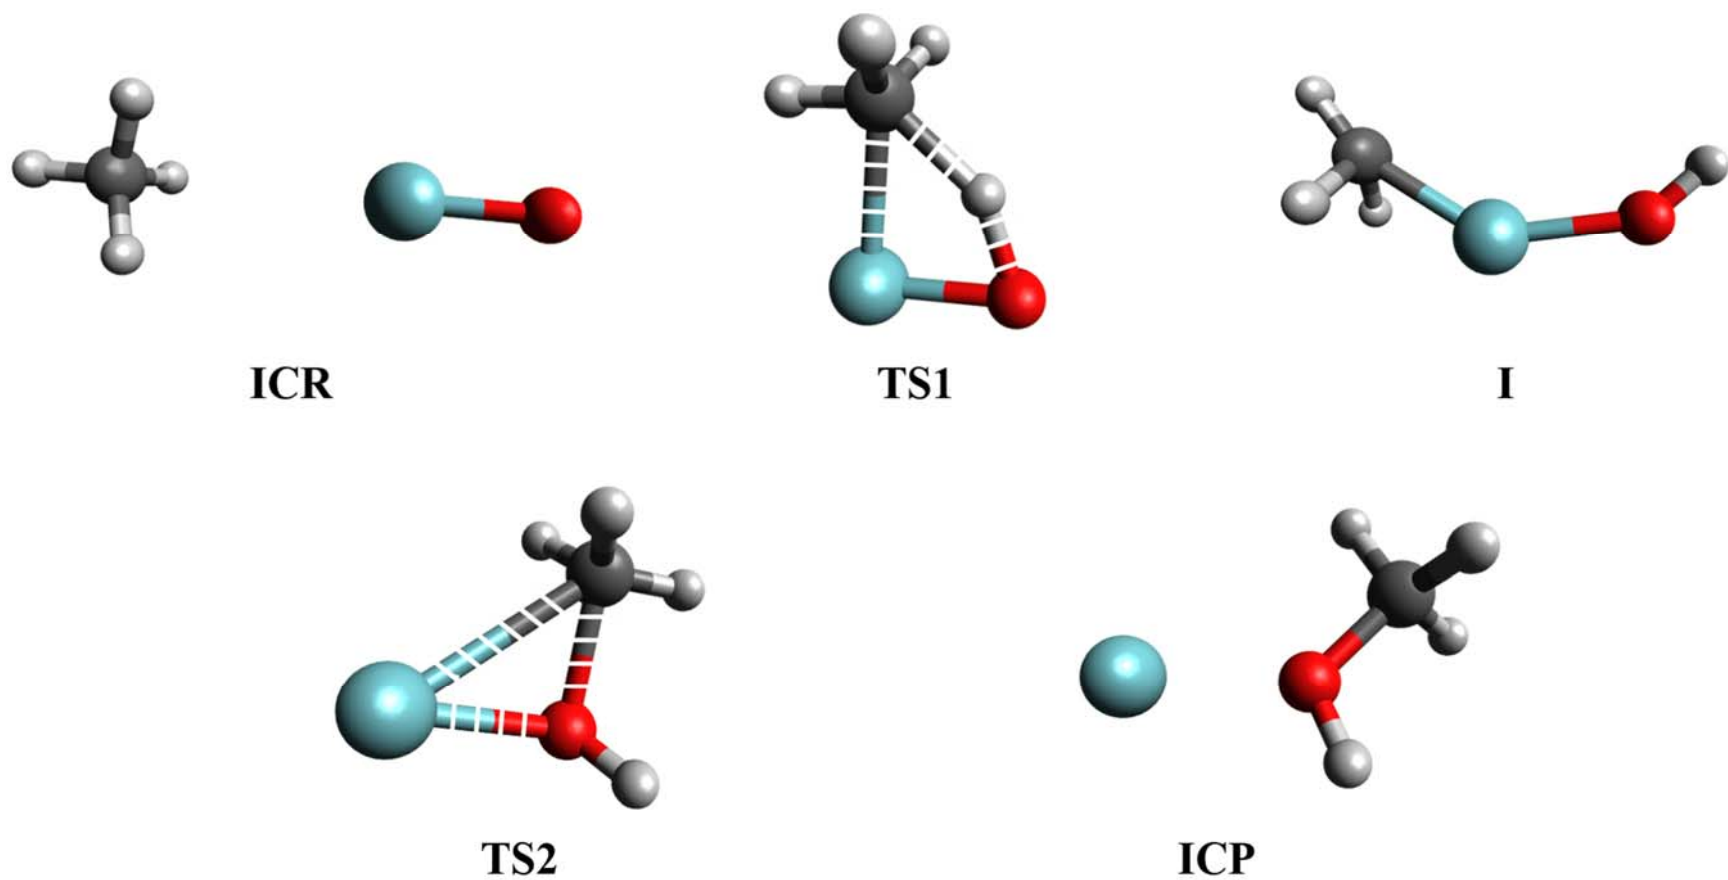

**Figure S2:** DFT/MN15 structures for intermediates and transition states of all steps along  $\text{NbO} + \text{CH}_4 \rightarrow \text{Nb} + \text{CH}_3\text{OH}$  reaction pathway for the lowest doublet spin state. The [2+2] mechanism is followed in this case.

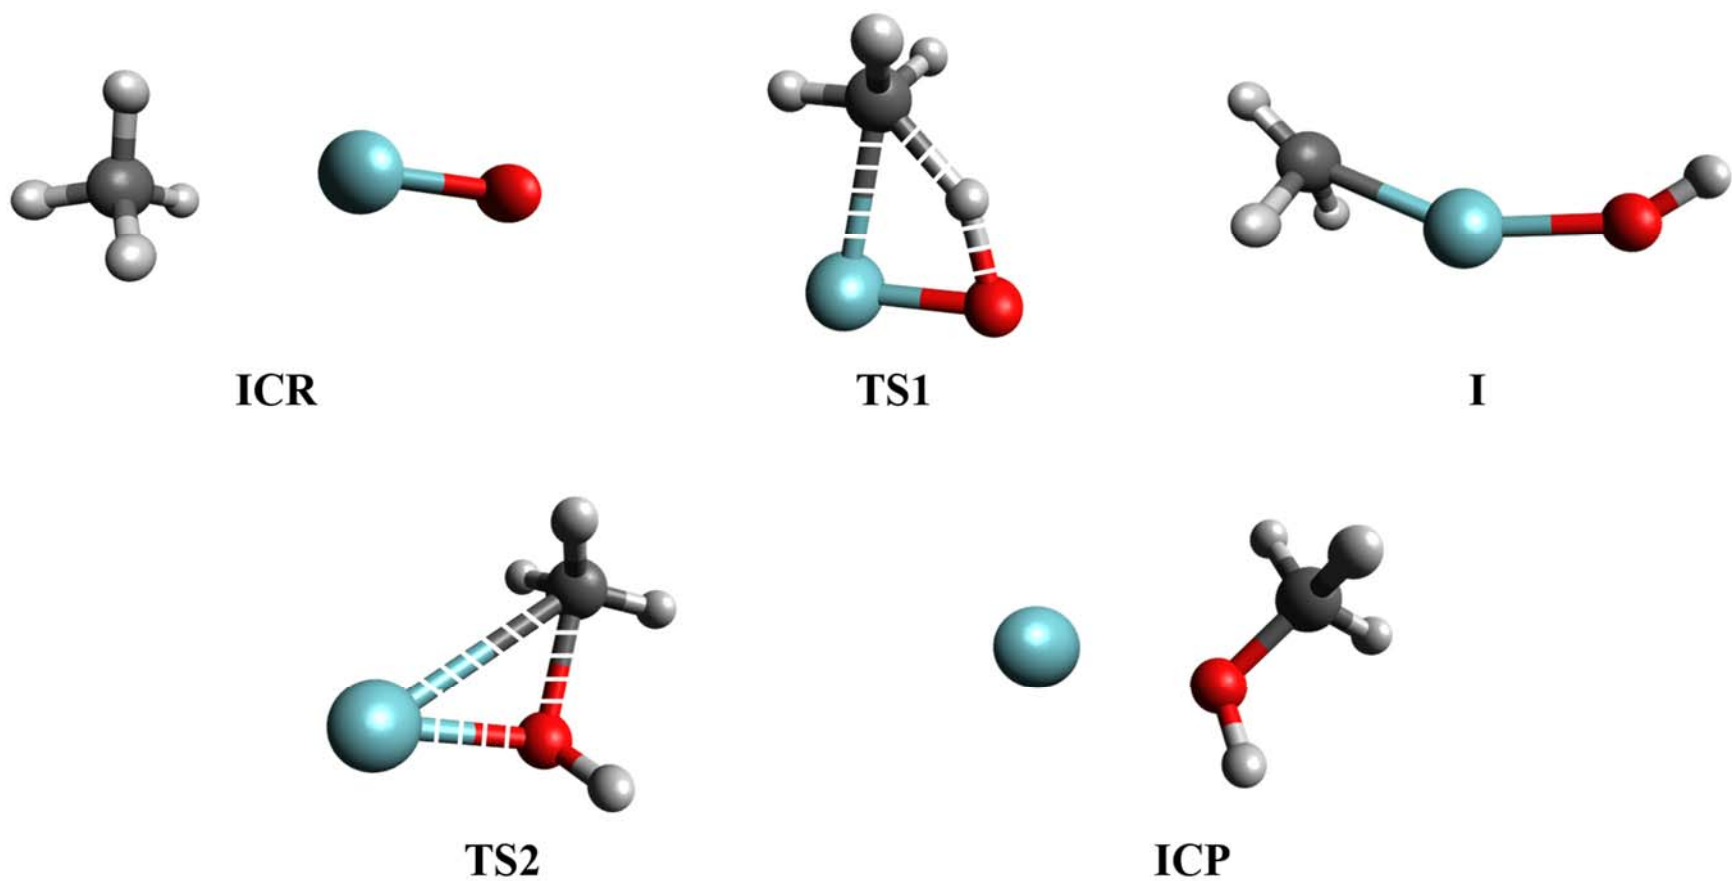

**Figure S3:** DFT/MN15 structures for intermediates and transition states of all steps along  $\text{NbO} + \text{CH}_4 \rightarrow \text{Nb} + \text{CH}_3\text{OH}$  reaction pathway for the lowest quartet spin state. The [2+2] mechanism is followed in this case.

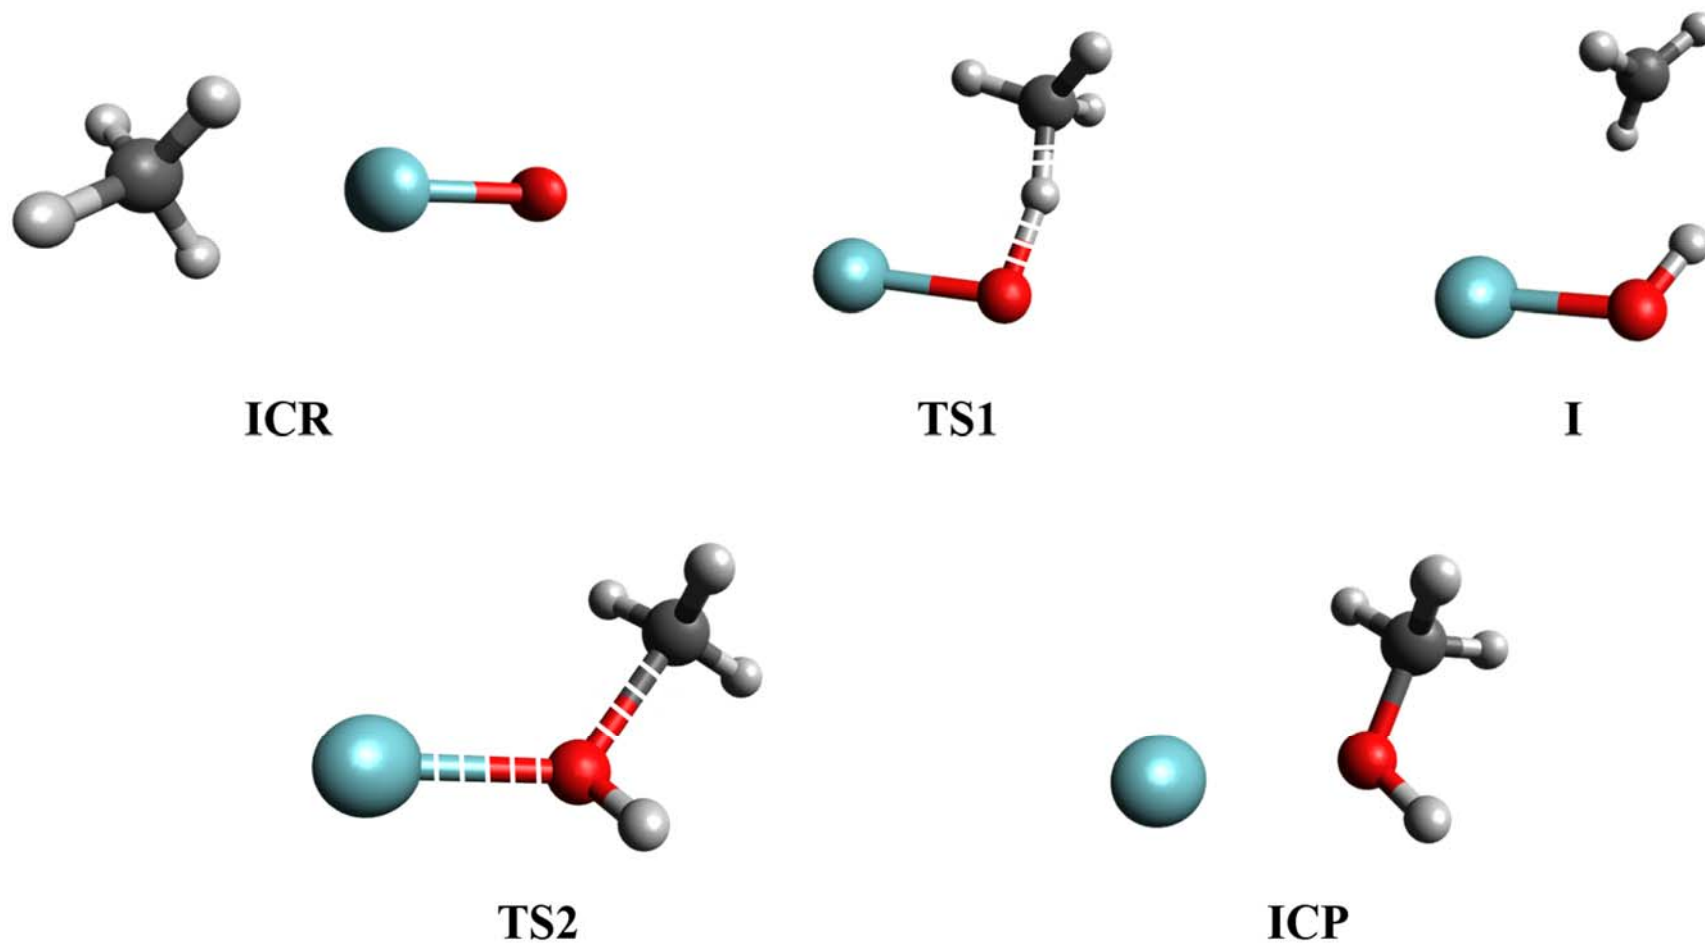

**Figure S4:** DFT/MN15 structures for intermediates and transition states of all steps along  $\text{NbO} + \text{CH}_4 \rightarrow \text{Nb} + \text{CH}_3\text{OH}$  reaction pathway for the lowest sextet spin state. The radical mechanism is followed in this case.

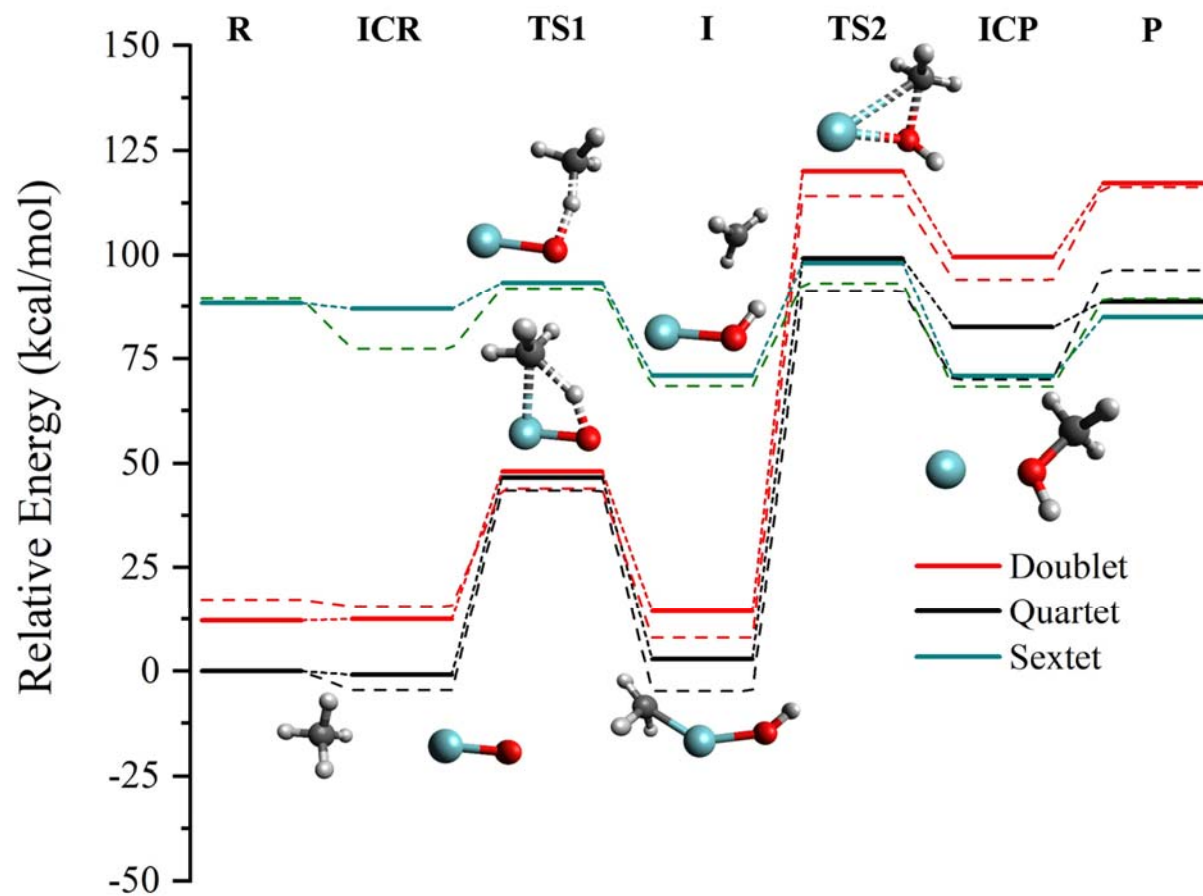

**Figure S5:** Comparison of the CCSD(T)//DFT/MN15 (solid and short-dashed lines) and MN15 (dashed-lines) potential energy diagrams for the  $\text{NbO} + \text{CH}_4 \rightarrow \text{Nb} + \text{CH}_3\text{OH}$  reaction pathway for the lowest doublet, quartet, and sextet spin states.
